# Supplementary material for: The magnesium transporter A is activated by cardiolipin and is highly sensitive to free magnesium in vitro
Source: eLife. 2016 Jan 18;5:e11407. doi: 10.7554/eLife.11407 (PMC4758953; doi:10.7554/eLife.11407)
Supplement: Figure 2—source data 1. — DOI: http://dx.doi.org/10.7554/eLife.11407.007 [file elife-11407-fig2-data1.xlsx]

## Sheet: Figure2B
	No lipid									E.coli lipid extract
	WT-Membrane			WT- IMAC			WT- SEC			WT- SEC			D373N
	1.127	1.155	0.902	0.824222	0.824576	0.655514	0.121883	0.128417	0.111173	1.76859	1.83125	1.53414	0.0144589	0.0181004	0.0193857

## Sheet: Figure2C
Specific activity (µmol min-1 mig-1 of MgtA)
	Lipid (µM)	Cardiolipin- C12E8			Lipid (µM)	DOPG - C12E8			Lipid (µM)	DOPC - C12E8			Lipid (µM)	DOPE - C12E8
	0	0.216052	0.0623504	0.0638005	0	-0.155151	-0.0971507	-0.111651	0	-0.0391503	0.00579993	0.0232001	0	0.0449502	0.0623504	0.178351
	5.8	2.77387	2.41862	2.58247	10.5	4.95034	4.49068	4.96339	11.2	0.0232001	0.0986007	0.121801	10.6	0.233452	0.198652	0.203002
	11.7	4.28043	4.37033	4.16298	20.9	6.8716	6.28725	6.2017	22.4	0.246502	0.265352	0.297252	21.2	0.559704	0.271152	0.339303
	17.5	6.37135	6.4482	6.7527	31.4	6.90785	7.1181	6.58595	33.6	0.285652	0.449503	0.501704	31.8	0.539404	0.397303	0.391503
	23.3	8.74066	8.37671	9.11187	41.8	5.26354	5.65359	6.74255	44.8	0.858406	0.959907	0.951207	42.4	0.590155	0.587254	0.542304
	29.1	10.4763	10.2849	10.5445	52.3	4.64004	4.68063	5.09824	56	0.709055	0.887406	0.867107	53	0.403103	0.466903	0.481404
	58.3	12.4512	12.9355	12.7746	104.6	3.54093	3.80773	3.80048	112	0.494454	0.546654	0.500254	106	0.320452	0.356703	0.372653
	116.6	11.6552	12.3207	11.6073	209.1	3.81788	4.09628	4.41673	224	0.175452	0.317553	0.433553	212	0.359603	0.321902	0.449503
	233.1	12.6136	12.8993	12.3149	418.2	3.83528	4.11803	3.98028	448	0.382803	0.365403	0.424853	424.1	0.369753	0.365403	0.435003
	349.7	12.241	12.9472	12.8326	627.4	3.90778	3.78598	4.19343	672	0.0638005	0.498804	0.432103	636.1	0.440803	0.722105	0.598854
	466.2	13.1313	13.2357	13.0138	836.5	3.51048	3.89763	3.89183	896.1	0.459653	0.522004	0.643805	848.2	0.742406	0.555354	0.516204

## Sheet: Figure2D
Specific activity (%)
	microM lipid	E. coli cardiolipin			Bovine heart cardiolipin
	0	1.32275	1.45503	1.5873	1.32275	0.925926	2.1164
	5.8	16.7989	14.8148	15.6085	17.1958	17.8571	19.709
	11.7	21.6931	20.5026	19.709	21.164	21.4286	21.5608
	17.5	29.3651	26.5873	26.7196	33.3333	34.6561	27.5132
	23.3	43.3862	40.4762	41.5344	51.7196	55.9524	53.0423
	29.1	58.8624	55.4233	59.9206	64.8148	67.5926	65.4762
	58.3	89.5503	94.0476	95.1058	68.1217	68.7831	69.0476
	116.6	87.963	92.9894	95.7672	72.4868	73.1481	69.709
	233.1	92.1958	99.0741	100	71.2963	72.2222	72.8836
	349.7	88.0952	91.7989	95.7672	71.9577	72.0899	72.8836
	466.2	90.873	93.9153	97.4868	71.5608	70.1058	69.5767

## Sheet: Figure2F
Specfic activity %
	µM	Mg			Mn			Ca			Ni			Zn			Co
	0	100	100	100	100	100	100	100	100	100	100	100	100	100	100	100	100	100	100
	5	104.171	106.36	102.728	99.93	98.221	99.9159	97.5059	98.4381	99.2951	100.716	92.3752	94.6334	17.6771	16.8429	16.4273	80.2156	82.624	79.0998
	10	114.29	105.701	96.7952	97.2977	99.7619	101.402	96.0094	94.5202	96.0101	97.1037	96.3559	98.7453	15.9825	15.3714	12.2031	75.0809	68.757	73.4022
	25	108.026	106.697	103.551	99.4119	101.597	104.963	87.2662	88.4712	91.7947	91.5603	91.2776	94.1497	13.6304	11.6571	12.2742	60.1078	61.3867	57.8461
	50	94.9734	95.0459	97.7897	95.5506	89.1848	91.121	85.7032	86.642	91.4825	76.7158	77.0503	79.533	4.34068	5.47006	5.08709	43.4097	42.5733	41.5148
	100	93.6606	94.4954	93.9957	90.7725	86.6419	87.797	76.595	80.275	79.5278	52.8107	55.1698	54.1116	1.92398	2.30825	1.98408	32.956	35.5785	35.7316
	250	90.4672	94.3119	89.8826	85.5835	76.1759	78.3045	60.9286	63.4967	64.2055	15.7113	15.4541	16.7312	0.480996	0.973792	0.992042	6.0989	6.98302	8.86336
	500	88.4802	88.1078	87.6154	71.3078	67.2051	67.6185	47.9123	49.9422	50.3182	4.37964	3.65961	3.94077	0.527921	0.192354	0.426808	0.791209	1.04577	0.82225
	1000	72.2294	72.8555	69.8758	49.1782	45.1926	46.3357	31.6446	32.3665	32.8203	1.3527	1.3448	1.17312	0.351946	0.613128	0.161494	-0.0329676	-0.224896	-0.556228

## Sheet: Figure2-supplement figure2
Specific activity (%)
	Cardiolipin	0	29.1	58.3	116.6	233.1	349.7
		100	104.275	104.658	109.601	109.644	106.76
		98.5087	96.5488	103.877	101.733	103.863	108.649
		97.5004	101.335	104.346	107.03	109.601	109.09
	DOPG	0	52.3	104.6	209.1	418.2	627.4
		100	96.963	96.0593	94.4741	87.1556	86.237
		96.2074	99.6148	95.037	93.0519	90.6667	82.5481
		88.2963	96.5333	95.3778	93.3926	85.2444	83.5111
	DOPE	0	56	112	224	448	672
		100	100.458	102.036	102.17	99.4877	97.6409
		101.901	104.624	100.62	97.8296	105.635	95.1335
		102.952	104.058	92.5047	100.054	94.8234	90.9949
	C12E8	0	83.3	166.7	333.3	666.7	1000
		100	94.304	93.137	84.0928	57.8633	42.9842
		99.8333	98.4579	95.207	85.1764	54.5707	40.7196
		95.8322	95.1236	78.1467	96.5129	57.1825	39.6777

## Sheet: Figure2- supplement figure3
Specific activity (%)
	MgtA	100
		102.768
		99.049
	Azide	102.465
		110.697
		108.725
	MgF4-	67.0988
		73.1879
		65.845
	vanadate	24.4701
		25.9179
		28.8986
	ALF4-	6.74205
		8.42638
		7.1726
	ADP-AlF4-	7.5511
		5.89989
		6.26893
	D373N	0.625414
		0.55888
		0.505654

## Sheet: Figure2- supplement figure 4
Specific activity (µmol min-1 mig-1 of MgtA)
	Mg++ (µM)	0 µM Ni++			5 µM Ni++			50 µM Ni++			250 µM Ni++
	10	0.271756	0.300031	0.256048	0.502671	0.419416	0.551367	0.0329877	0.179076	0.194785	0.661326	0.642476	0.647188
	25	0.691172	0.78071	0.702168	0.769714	0.672322	0.786994	0.40999	0.442978	0.469683	0.944078	0.812127	0.769714
	50	1.25511	1.30694	1.34936	1.51744	1.30851	1.32422	0.530946	0.914232	0.958215	0.765002	0.793277	0.702168
	100	2.18819	2.32171	2.35784	2.31386	2.2416	2.31386	1.41219	1.51901	1.48288	1.16714	1.0289	1.10587
	250	4.32139	4.67326	4.56173	4.51932	4.65913	4.8492	3.18253	3.35061	3.53597	1.6651	1.70122	1.69965
	500	6.77977	7.05466	7.09865	7.02168	7.04367	6.98869	5.20735	5.1508	5.16965	2.23688	1.93371	2.34213
	1000	8.95225	9.25856	9.15174	8.94125	9.02608	9.01508	7.37198	7.18347	7.17876	3.12127	3.459	3.54697
	2000	10.1037	10.1382	9.89005	10.0691	10.2608	10.7069	8.37103	8.5831	8.1951	4.17531	4.35752	4.70154
