# Supplementary material for: The magnesium transporter A is activated by cardiolipin and is highly sensitive to free magnesium in vitro
Source: eLife. 2016 Jan 18;5:e11407. doi: 10.7554/eLife.11407 (PMC4758953; doi:10.7554/eLife.11407)
Supplement: Figure 3—source data 1. — DOI: http://dx.doi.org/10.7554/eLife.11407.014 [file elife-11407-fig3-data1.xlsx]

## Sheet: Sheet1
		Specific activity (µmol min-1 mig-1 of MgtA)
	MgtA	16.2564
		15.8643
		13.6475
	MgtA N	14.2488
		13.2554
		16.245
