# Supplementary material for: The magnesium transporter A is activated by cardiolipin and is highly sensitive to free magnesium in vitro
Source: eLife. 2016 Jan 18;5:e11407. doi: 10.7554/eLife.11407 (PMC4758953; doi:10.7554/eLife.11407)
Supplement: Figure 4—source data 1. — DOI: http://dx.doi.org/10.7554/eLife.11407.017 [file elife-11407-fig4-data1.xlsx]

## Sheet: Figure4A
		Specific activity (µmol min-1 mig-1 of MgtA)
	Mg2+ total (mM)	1mm ATP			3mM ATP			6mM ATP
	0	0.329877	0.544769	0.395853	1.10702	1.0042	1.05218	0.22306	0.0219917	0.0345587
	0.01	0.889727	1.33459	0.931197	0.45069	0.411276	0.359866	-0.303173	0.290606	0.318882
	0.025	1.65504	1.65504	1.64373	0.74201	0.829406	0.731728	-0.150801	0.485391	0.458687
	0.05	2.72196	2.88973	2.97455	1.8336	1.97412	1.95185	0.710022	0.931511	0.986491
	0.1	4.18473	4.09048	4.55042	2.47965	2.63045	2.49165	1.23783	1.1907	1.7185
	0.15	5.52309	6.03393	6.07352	3.17196	3.4907	3.38617	2.06252	2.23531	2.24317
	0.25	7.49105	7.49105	8.78982	5.08782	5.05526	5.12552	3.36632	3.43544	3.31605
	0.5	10.8709	10.8709	10.9915	7.63945	7.83138	7.76797	5.90167	5.24505	5.51995
	0.75	12.3035	12.7502	12.7615	9.56388	9.72496	9.18173	7.99874	7.11436	7.19604
	1	13.9849	13.8624	13.8266	10.0985	10.3042	10.0745	9.35124	8.46371	7.98146
	1.5	14.6409	14.1621	13.8567	11.7351	11.5808	11.8516	10.388	9.70625	9.95287
	2	13.9001	13.3044	13.3025	12.7941	12.7324	12.8678	12.0924	10.1728	10.6786
	2.5	10.8954	10.8313	10.3996	14.9396	14.7168	14.6568	12.0122	11.8944	10.7776
	3	8.09236	8.90292	8.46748	14.261	14.734	14.4323	12.9972	13.3333	13.3946
	3.5	6.71253	7.01602	7.18944	13.2088	13.4881	13.4899	13.5941	13.6475	13.9742
	4	4.40151	5.08577	5.07069	10.7017	11.9424	12.1189	13.2799	13.0961	12.5903
	4.5	4.01885	4.12441	3.93779	7.9976	9.0892	8.57167	12.6516	13.3993	13.3145
	5	3.03299	3.13101	3.25919	5.79556	6.50673	6.5907	12.9563	13.5281	13.6836
	6	1.25353	1.8115	1.41376	2.33913	3.66378	4.02365	8.49042	10.7901	11.2253
	7	1.26484	1.31008	1.44958	1.84903	2.04267	1.96556	4.60886	7.17248	7.51335
	8	0.934967	0.754005	0.833176	1.00591	1.21326	0.911662	3.60195	4.46591	4.48005
	9	0.201697	0.213007	0.388313	0.940793	1.02648	1.00591	2.28244	2.5699	2.6076
	10	2.17531	2.30537	2.31291	0.772856	0.766001	0.74201	1.23783	1.23468	0.345586
	15	2.02827	1.71348	2.00754	0.231343	0.274184	0.205638	2.02796	1.8803	0.108388

## Sheet: Figure4B
Specific activity (µmol min-1 mig-1 of MgtA)
	freeMg++ (µM) in 1mM ATP	specific activity in 1mM ATP			freeMg++ (µM) in 2mM ATP	specific activity in 2mM ATP			freeMg++ (µM) in 3mM ATP	specific activity in 3mM ATP
	0	0.329877	0.544769	0.395853	0	1.10702	1.0042	1.05218	0	0.22306	0.0219917	0.0345587
	0.6614	0.889727	1.33459	0.931197	0.2292	0.45069	0.411276	0.359866	0.1157	-0.303173	0.290606	0.318882
	1.6	1.65504	1.65504	1.64373	0.5759	0.74201	0.829406	0.731728	0.2901	-0.150801	0.485391	0.458687
	3.4	2.72196	2.88973	2.97455	1.1	1.8336	1.97412	1.95185	0.5826	0.710022	0.931511	0.986491
	7.1	4.18473	4.09048	4.55042	2.3	2.47965	2.63045	2.49165	1.1	1.23783	1.1907	1.7185
	11.2	5.52309	6.03393	6.07351	3.5	3.17196	3.4907	3.38617	1.7	2.06252	2.23531	2.24317
	20.8	7.49105	7.49105	8.78982	6.2	5.08782	5.05526	5.12552	3	3.36632	3.43544	3.31605
	56	10.8709	10.8709	10.9915	13.5	7.63945	7.83138	7.76797	6.2	5.90167	5.24505	5.51995
	119.6	12.3035	12.7502	12.7615	22.4	9.56388	9.72496	9.18173	9.8	7.99874	7.11436	7.19604
	232.1	13.9849	13.8624	13.8266	33.3	10.0985	10.3042	10.0745	13.8	9.35124	8.46371	7.98146
	604.1	14.6409	14.1621	13.8567	64.3	11.7351	11.5808	11.8516	22.9	10.388	9.70625	9.95287
	1061.9	13.9001	13.3044	13.3025	118.1	12.7941	12.7324	12.8678	34.1	12.0924	10.1728	10.6786
	1543.4	10.8954	10.8313	10.3996	221.5	14.9396	14.7168	14.6568	48.4	12.0123	11.8944	10.7776
	2033.2	8.09237	8.90292	8.46748	425.1	14.261	14.734	14.4324	67	12.9972	13.3333	13.3946
	2526.9	6.71254	7.01602	7.18944	755.2	13.2088	13.4881	13.4898	92.2	13.5941	13.6475	13.9742
	3022.6	4.40151	5.08577	5.07069	1169.9	10.7017	11.9424	12.1189	127.7	13.2799	13.0961	12.5903
	3519.5	4.01885	4.12441	3.93779	1624.4	7.9976	9.0892	8.57167	180.3	12.6516	13.3993	13.3145
	4017.1	3.03299	3.13101	3.25919	2097.3	5.79556	6.50673	6.5907	263.1	12.9563	13.5281	13.6836
	5013.7	1.25353	1.8115	1.41376	3066.9	2.33913	3.66378	4.02365	614.9	8.49042	10.7901	11.2253
	6011.5	1.26484	1.31009	1.44958	4050.8	1.84903	2.04267	1.96556	1306.3	4.60886	7.17248	7.51335
	7009.8	0.934967	0.754005	0.833176	5041	1.00591	1.21326	0.911661	2187	3.60195	4.46591	4.48005
	8008.5	0.201697	0.213007	0.388313	6034.2	0.940794	1.02648	1.00591	3131.9	2.28244	2.5699	2.6076
	9007.6	2.17531	2.30537	2.31291	7029.4	0.772856	0.766001	0.74201	4101.2	1.23783	1.23468	0.345586
	14004.9	2.02828	1.71348	2.00754	12017.3	0.231343	0.274184	0.205638	9045.7	2.02796	1.8803	0.108389

## Sheet: Figure 4D
		Specific activity (µmol min-1 mig-1 of MgtA)
	ATP (mM)	1mM MgCl2			2mM MgCl2			3mM MgCl2			4mM MgCl2			5mM MgCl2			6mM MgCl2
	0	0.194156	0.258247	0.275212	0.301602	0.222432	0.162111	-0.0942508	0.135378	0.282752	0.313598	0.327307	0.423271	0.0958215	0.16651	0.0706881	0.102105	0.150801	0.218347
	0.1	8.72007	9.07634	8.91235	8.51461	6.85014	6.54665	3.63294	3.48556	3.36218	1.97584	1.82161	1.68452	1.43104	1.65881	1.93999	1.60698	1.75778	1.552
	0.5	15.8662	16.6164	16.0415	11.5174	12.2036	11.1178	8.75503	8.72076	8.56653	5.41685	6.12458	5.79042	3.84543	3.6852	3.6585	2.40968	2.38454	2.39397
	1	15.7154	16.0377	16.0057	12.9312	13.1442	11.0839	9.6427	9.87062	10.1397	6.2651	6.92314	6.55299	3.85328	4.02136	5.02356	3.07414	3.32077	2.8181
	2	14.656	14.7653	15.0349	13.8058	15.312	15.0971	13.7058	13.351	12.8164	9.51761	10.1739	9.87919	6.25982	6.34621	5.22149	3.64122	4.33082	3.73233
	3	13.4722	13.7399	13.5457	12.4939	14.7898	14.9576	12.8952	13.1437	12.8421	10.9673	10.9365	11.2381	9.19887	7.61703	8.55796	5.81056	6.06975	6.06346
	4	12.4788	12.5071	12.328	13.4986	14.7276	14.8143	15.1966	16.17	15.6645	13.2345	14.2507	14.225	11.9007	12.4128	12.0185	8.29877	8.55011	8.54068
	5	11.6682	12.1678	11.885	14.8464	15.5306	14.984	15.9455	16.2968	18.6239	15.9695	15.817	15.5925	13.7433	13.9648	13.5957	11.2363	11.5473	11.6133
	6	11.4854	11.7022	11.508	14.8897	14.4958	14.6183	15.7622	15.1298	15.3697	14.53	15.2258	15.853	14.8728	14.8146	13.4574	13.0035	13.3098	14.7424
	7	10.4486	10.8483	10.9444	13.8737	14.0773	14.2733	15.8701	15.2086	15.2138	14.5318	14.686	16.0329	15.1068	15.8718	15.9818	15.8624	16.0729	16.054
	8	9.96041	10.1734	10.3468	13.8681	14.1659	14.3506	15.4554	15.3988	14.9619	15.5342	15.1384	15.0236	16.5143	15.8545	16.8646	15.7964	11.7813	12.8636
	10	8.46371	8.74647	8.8935	13.1329	7.0688	14.5033	13.423	13.4899	13.5173	14.2901	14.321	13.8257	13.0899	11.0116	12.5668	11.9541	11.0493	9.66384
	Free Mg++ valvues calculated with ATP concntration in B column and Mg++ concnetration in 18th row
	ATP (mM)	1mM MgCl2	2mM MgCl2	3mM MgCl2	4mM MgCl2	5mM MgCl2	6mM MgCl2
	0	1	2	3	4	5	6
	0.1	0.9071	1.9035	2.9023	3.9017	4.9014	5.9011
	0.5	0.5559	1.522	2.5135	3.5097	4.5076	5.5062
	1	0.2321	1.0619	2.0332	3.0226	4.0171	5.0137
	2	0.0619	0.3412	1.1182	2.0655	3.0449	4.034
	3	0.0333	0.1181	0.4251	1.1699	2.0973	3.0669
	4	0.0226	0.0657	0.1697	0.4959	1.2181	2.128
	5	0.0171	0.045	0.0971	0.2179	0.5584	1.2634
	6	0.0138	0.0341	0.067	0.1277	0.2631	0.6149
	7	0.0115	0.0275	0.051	0.0888	0.1575	0.306
	8	0.0099	0.023	0.0411	0.0678	0.1103	0.1865
	10	0.0077	0.0173	0.0296	0.0458	0.0682	0.1009

## Sheet: Figure4E & 4F
		Specific activity (µmol min-1 mig-1 of MgtA)
	Mg++ (mM)	pH 6.3			pH 6.6			pH 7			pH 7.2			ph 7.6			pH 7.9
	0	0.156456	0.113101	0.791706	0.0452403	0.454288	0.337417	-0.118756	-0.0885958	-0.0546655	0.0546654	0.133836	-0.0169651	-0.540999	-0.0301602	0	0.0320452	0.0113101	0.00188505
	0.01	1.57399	1.37229	1.40245	1.7229	1.65881	1.57587	1.87182	1.8737	1.86051	1.45146	1.33271	1.31197	0.286522	0.307257	0.327993	0.222432	0.241282	0.243167
	0.025	2.07729	2.14326	2.31291	2.27144	1.85674	2.75966	2.50141	2.56173	2.51838	1.82092	1.78511	1.76626	0.554194	0.557964	0.574929	0.196042	0.186616	0.241282
	0.05	2.65033	2.97267	2.58058	2.3148	2.72762	2.34684	3.58153	3.57399	3.60792	2.44675	2.62582	2.36569	0.895382	0.972667	0.918002	0.356268	0.377003	0.373233
	0.1	4.59001	4.51461	3.58718	3.3836	3.14797	3.72102	5.07446	5.13855	5.01037	3.9623	3.92648	4.2394	1.31008	1.41942	1.35532	0.529689	0.565504	0.62394
	0.15	4.94816	5.54383	4.80302	5.31008	5.44204	6.07352	6.68049	6.75778	6.74647	5.44392	5.48728	5.58907	1.99057	1.94345	2.01885	0.772856	0.740811	0.827521
	0.25	5.24599	5.3082	5.05561	5.57399	6.64091	6.13949	8.76155	9.05749	8.75024	7.41564	7.45712	7.56268	2.94251	2.95382	2.95193	1.15174	1.12724	1.20075
	0.5	7.04995	6.78982	7.09519	8.39585	9.20641	8.58812	11.738	11.8982	11.7135	10.4486	10.6993	10.5976	4.96136	4.93874	4.97832	1.96042	2.20924	2.04524
	0.75	8.77851	8.25259	7.76437	9.93026	9.99246	10.6428	13.3723	13.5024	13.0141	13.0613	12.4712	12.5957	6.8558	6.69934	6.77286	3.04807	3.16305	3.27427
	1	8.82375	8.5278	8.48068	11.5834	10.3657	11.7304	14.9048	14.4543	13.7776	13.5683	13.5212	13.6343	8.00754	7.86805	7.73044	3.58907	3.7738	3.95288
	1.5	8.23751	7.43072	7.53252	10.7012	11.0122	11.1216	15.2102	14.492	14.1169	14.5353	14.6013	15.4892	9.96984	9.8115	9.86616	4.81244	4.96136	4.88973
	2	7.80584	8.14515	8.37512	12.1697	11.2988	11.7116	14.786	14.6296	13.9435	15.278	14.7597	16.4543	11.2328	11.5212	11.6305	6.43921	6.11876	5.98304
	2.5	8.08483	7.37795	7.41376	9.7738	11.1291	12.2451	13.606	14.1112	13.9321	15.5174	14.7144	14.9953	12.23	12.5297	12.4411	7.04053	6.96513	6.7295
	3	6.42036	5.34401	5.59095	7.99435	7.65693	10.2545	11.5985	10.4279	11.1762	14.1206	13.1951	13.6042	13.2573	13.0462	13.0688	7.78134	7.90575	7.90575
	3.5	4.53157	4.46937	4.7295	6.40339	6.3393	7.48916	7.96607	8.06032	7.75495	10.3525	10.1546	10.6107	12.901	12.1621	12.0622	7.79642	7.92837	8.16211
	4	4.76343	5.11593	6.09048	4.32422	4.32611	4.86334	7.10839	8.04147	7.52498	8.05467	8.20547	8.21678	10.9293	10.7276	11.0217	8.07352	8.28464	8.38831
	4.5	3.15551	2.47314	2.90669	2.45806	3.36475	3.39114	3.14043	2.9689	2.96324	5.2196	6.23563	6.7672	9.62865	9.25353	9.14609	7.33836	7.56079	7.82281
	5	1.99435	1.38926	1.51932	1.73044	2.84826	2.5655	3.18379	3.21583	3.26484	2.00942	2.00942	2.00942	7.96607	7.79076	7.90198	7.18944	7.42507	7.23845
	6	0.946277	1.38549	0.667295	1.81904	1.86993	2.40716	-0.539114	-0.467484	-0.535344	2.68049	2.79548	3.07446	5.4345	5.01791	5.6984	5.63808	6.11499	7.90198
	7	0.401508	0.910462	0.827521	1.17436	1.94156	1.88124	1.18379	1.02168	1.18756	1.98492	1.8869	2.05655	3.99811	4.02451	4.17719	5.1442	4.74835	7.55514
	8	0.67672	0.324222	0.269557	3.28558	1.27427	1.11216	0.823751	0.842601	0.846372	1.61169	2.74081	1.73798	4.54665	2.77851	3.10839	5.21583	3.86051	3.94157
	9	0.367578	0.122526	0.735155	1.13289	1.05561	0.767201	0.320452	0.525919	0.67295	0.889727	1.96607	1.39303	2.42413	2.03959	1.87747	2.82941	2.99717	3.04807
	10	2.85768	0.963242	0.974552	-0.539114	-0.341188	-0.524034	0.371348	0.412818	0.473139	0.61263	1.23091	0.904807	1.3836	1.5099	1.12347	2.14326	2.26013	2.23186
	15	-0.0358152	-0.0622054	0.214892	0.352498	0.292177	0.548539	0.124411	0.105561	0.0904807	1.32516	0.335532	2.84637	0.6541	0.537229	1.3836	1.4722	1.24599	5.07257
	Free Mg++ calculated with Mg++ value in Bcolumn, 3mM ATP at the indicated pH level in 30th row
	Mg++ (mM)	pH
		6.3	6.6	7	7.2	7.6	7.9
	0	0	0	0	0	0	0
	0.01	1.5	1	0.67	0.67	0.43	0.35
	0.025	2.2	1.4	0.98	0.98	0.66	0.57
	0.05	3.3	2.2	1.5	1.5	1	0.97
	0.1	5.7	3.8	2.6	2.6	1.9	1.8
	0.15	8.1	5.5	3.8	3.8	2.9	2.7
	0.25	13.3	9	6.3	6.3	4.9	4.7
	0.5	28	19.2	13.6	13.6	10.8	10.3
	0.75	45.6	31.5	22.5	22.5	17.9	17.1
	1	66.8	46.4	33.4	33.4	26.7	25.5
	1.5	124.7	88.4	64.4	64.4	51.8	49.7
	2	216	158.2	118.1	118.1	96.5	92.7
	2.5	363.8	282	221.6	221.6	187.1	181
	3	594.8	498.7	425.2	425.2	381.6	373.7
	3.5	915.3	823.3	755.3	755.3	716.3	709.3
	4	1304.1	1225.3	1169.9	1169.9	1139.7	1134.4
	4.5	1734.6	1668.8	1624.4	1624.4	1600.9	1596.8
	5	2188.9	2133.7	2097.3	2097.3	2078.4	2075.1
	6	3134.1	3093.1	3066.9	3066.9	3053.3	3051.1
	7	4103.5	4071.2	4050.8	4050.8	4040.4	4038.7
	8	5084.1	5057.6	5041	5041	5032.6	5031.1
	9	6070.7	6048.2	6034.2	6034.2	6027.1	6025.9
	10	7061	7041.6	7029.4	7029.4	7023.3	7022.3
	15	12036.1	12024.5	12017.3	12017.3	12013.7	12013.1
